# Supplementary material
Source: PubMed Central journal article supplement (PMC2804832)

No anti-CDC14B control

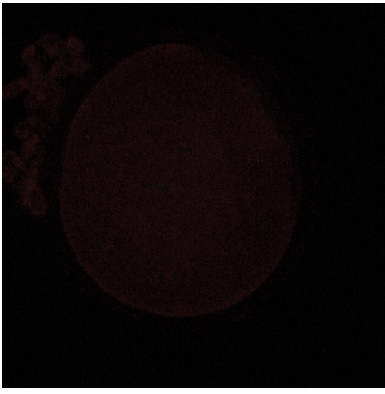

Schindler and Schultz Supplemental Fig. S1

Supplement: supp_108.074906_biolreprod.108.074906-1.pdf [file supp_108.074906_biolreprod.108.074906-1.pdf]

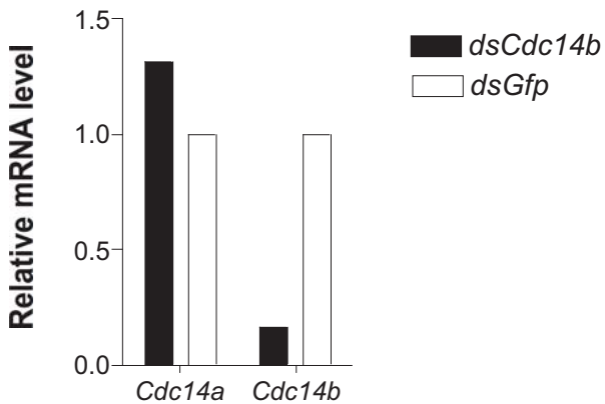

Supplement: supp_108.074906_biolreprod.108.074906-2.pdf [file supp_108.074906_biolreprod.108.074906-2.pdf]

*Cdc14b*-C314S

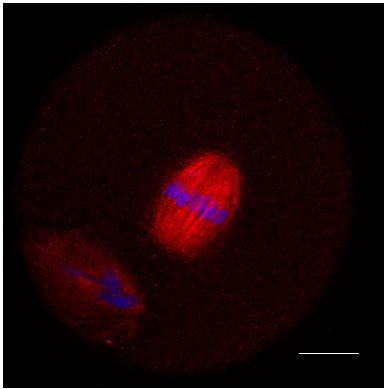

CDC14B + DNA

Schindler and Schultz Supplemental Fig. S3

Supplement: supp_108.074906_biolreprod.108.074906-3.pdf [file supp_108.074906_biolreprod.108.074906-3.pdf]
